# Supplementary material
Source: MDPI journal article supplement (https://www.mdpi.com/2071-1050/14/9/5199)
Supplement: s1 [file s1]

Table S1. Locations for eight wild species and conservation species.

| Species                                           | Abbreviation | Life forms      | Wild species               |                             | Conservation species  |
|---------------------------------------------------|--------------|-----------------|----------------------------|-----------------------------|-----------------------|
|                                                   |              |                 | Location and altitude      |                             | Location and altitude |
|                                                   |              |                 | Shanxi                     | Beijing                     | Botanic garden        |
| <i>Amygdalus davidiana</i>                        | Amy dav      | Deciduous tree  | 35°40'N, 112°1'E<br>1149 m | 39°57'N, 115°25'E<br>1166 m |                       |
| <i>Acer truncatum</i>                             | Ace tru      | Deciduous tree  | 35°30'N, 112°1'E<br>1321 m | 39°58'N, 115°25'E<br>1146 m |                       |
| <i>Quercus aliena</i><br><i>var. acutiserrata</i> | Que ali      | Deciduous tree  | 35°37'N, 112°9'E<br>1286 m | --                          |                       |
| <i>Syringa pekinensis</i>                         | Syr pek      | Deciduous tree  | --                         | 39°58'N, 115°25'E<br>1238 m | 39°48'N, 116°28'E     |
| <i>Cotinus coggygria</i>                          | Cot cog      | Deciduous tree  | 35°40'N, 112°32'E<br>757 m | --                          | 76 m                  |
| <i>Rhododendron mucronulatum</i>                  | Rho muc      | Deciduous shrub | --                         | 39°57'N, 115°25'E<br>1306 m |                       |
| <i>Forsythia suspensa</i>                         | For sus      | Deciduous shrub | 35°40'N, 112°1'E<br>1157 m | --                          |                       |
| <i>Sambucus williamsii</i>                        | Sam wil      | Deciduous shrub | --                         | 39°57'N, 115°26'E<br>1061 m |                       |
